# Supplementary material
Source: PubMed Central journal article supplement (PMC4815103)
Supplement: supp_tpc.15.00179_TPC2015-00179-RAR1_Supplemental_Data_FINAL.pdf [file supp_tpc.15.00179_TPC2015-00179-RAR1_Supplemental_Data_FINAL.pdf]

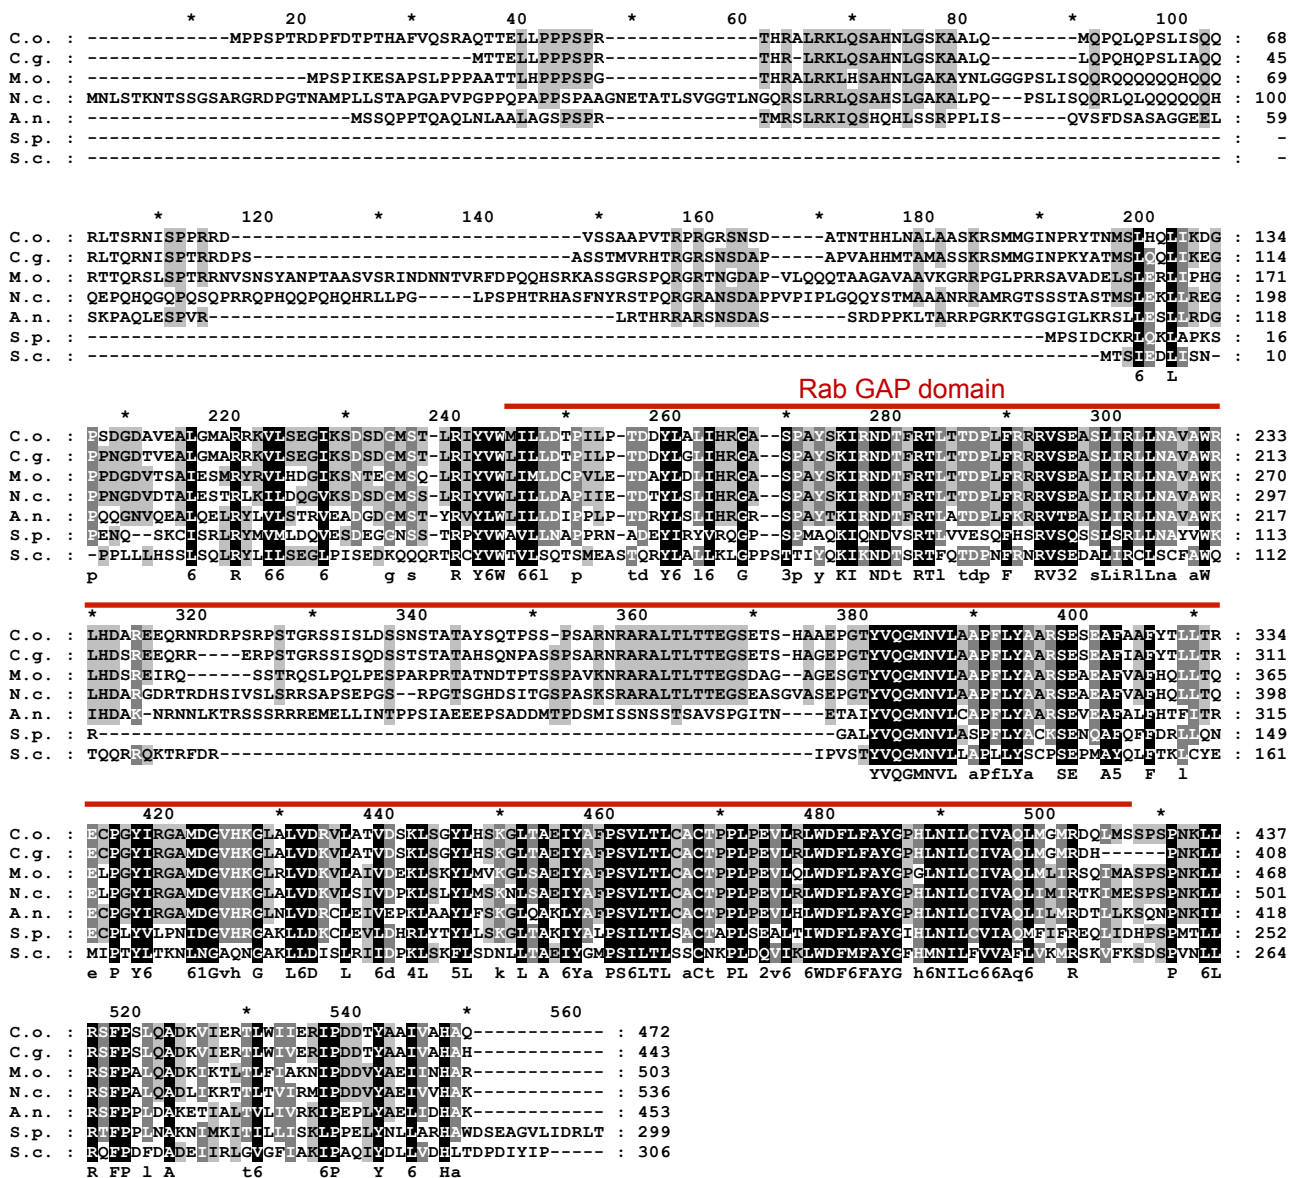

## Supplemental Figure 1. Amino acid sequence alignment of Co Bub2 homologs.

Co Bub2 homologs (*C.o.*, *Colletotrichum orbiculare*) were identified in *Colletotrichum graminicola* (*C.g.*), *Magnaporthe oryzae* (*M.o.*), *Neurospora crassa* (*N.c.*), *Aspergillus nidulans* (*A.n.*), *Schizosaccharomyces pombe* (*S.p.*), and *Saccharomyces cerevisiae* (*S.c.*). The alignment was generated using Clustal W and shaded using Gene Doc. Numbers on the right indicate amino acid residue positions. Shading of residues represents percentage amino acid conservation: black, 100%; dark grey, 80%; light grey, 70%. Gaps introduced for alignments are indicated by a hyphen. The Rab GAP domain is indicated by a red line.

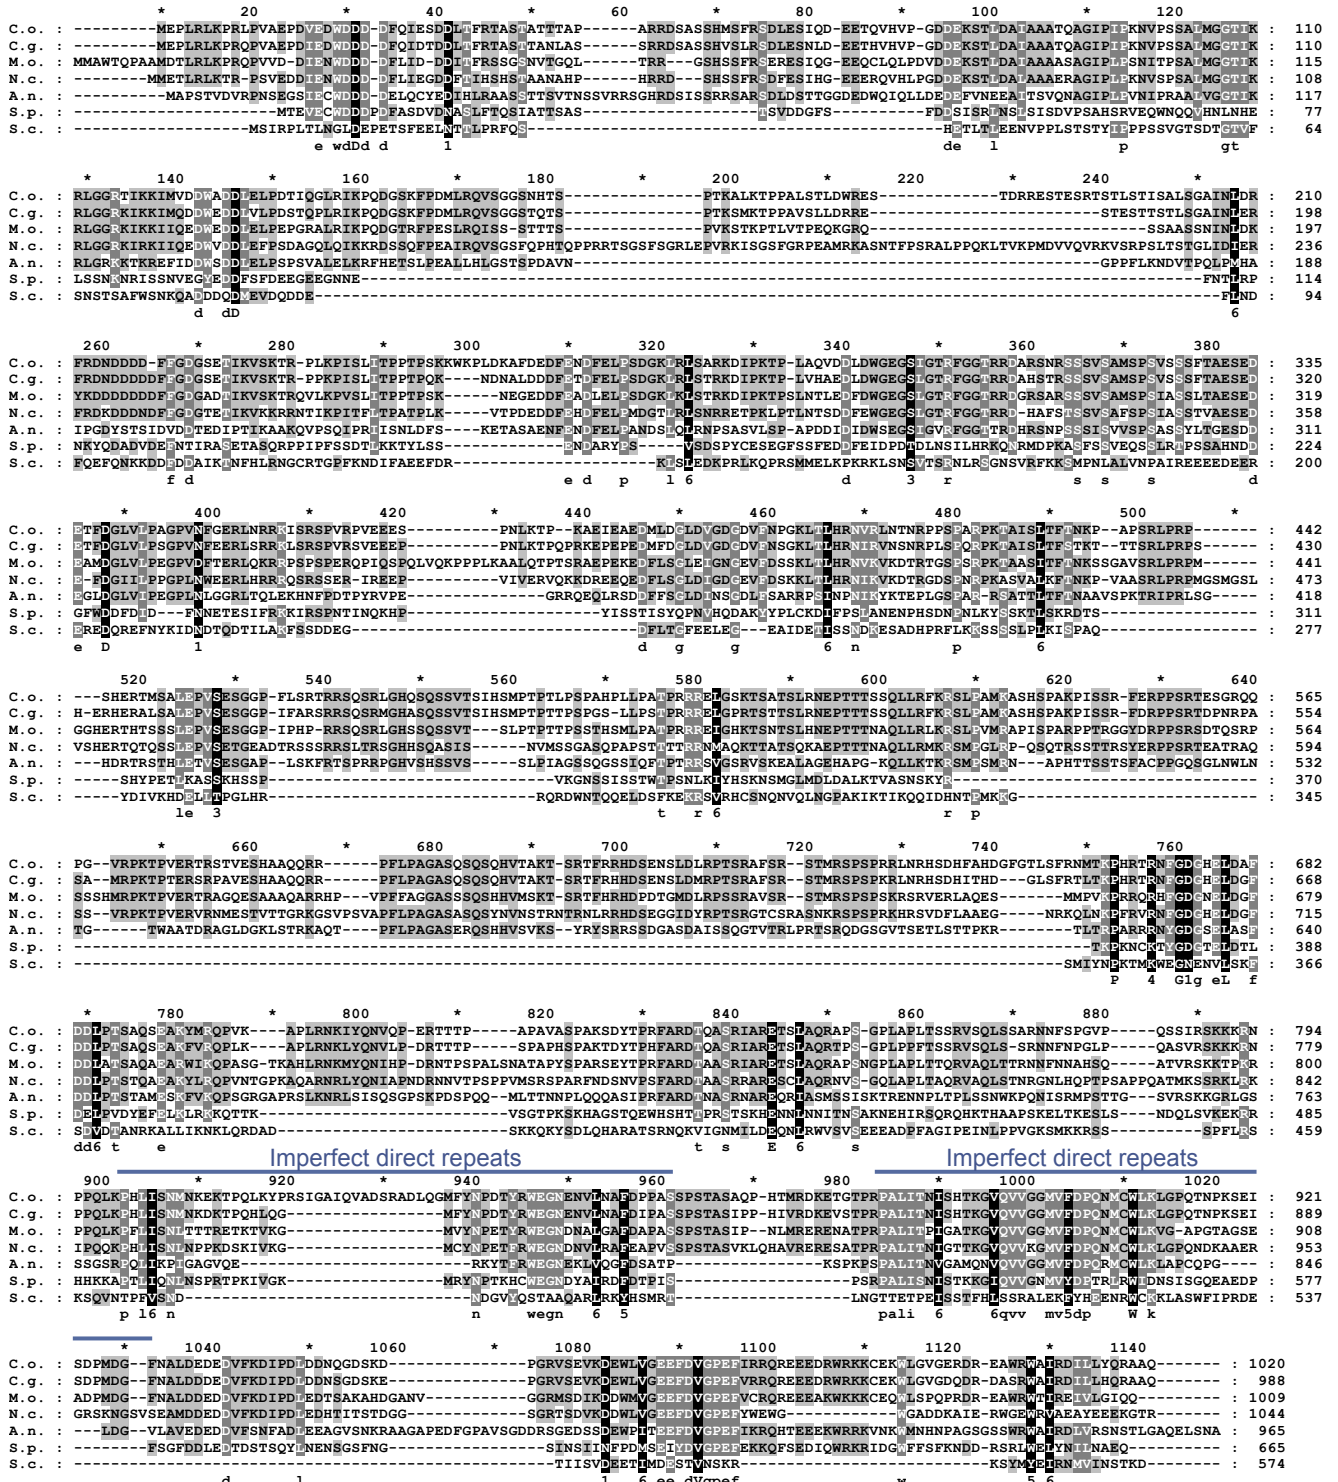

## Supplemental Figure 2. Amino acid sequence alignment of Co Bfa1 homologs.

Co Bfa1 homologs were identified in *Colletotrichum graminicola* (C.g), *Magnaporthe oryzae* (M.o.), *Neurospora crassa* (N.c.), *Aspergillus nidulans* (A.n.), *Schizosaccharomyces pombe* (S.p.), and *Saccharomyces cerevisiae* (S.c.). The alignment was generated using Clustal W. Numbers on the right indicate amino acid residue positions. Shading of residues represents percentage amino acid conservation: black, 100%; dark grey, 80%; light grey, 70%. Gaps introduced for alignments are indicated by a hyphen. The two imperfect direct repeats are indicated by a blue line.

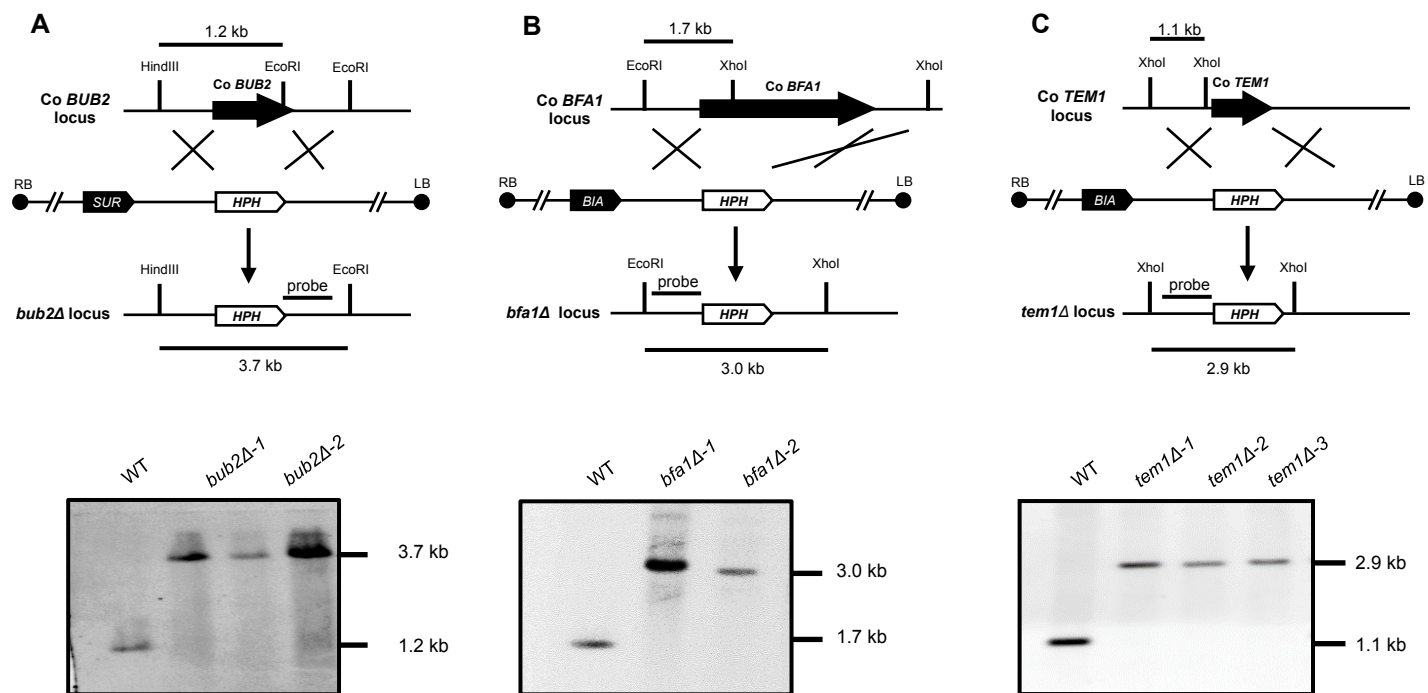

### Supplemental Figure 3. Southern blot analysis of targeted gene deletion mutants.

Genomic DNA was extracted from each putative transformant and the wild-type strain and digested with restriction enzymes indicated in the schematic diagrams on the left. Blots were probed with a labeled restriction fragment after fractionation by gel electrophoresis. The size difference in each blot was consistent with successful gene disruption with the resistance cassette *HPH* between the left border (LB) and right border (RB) sequences. *HPH*, hygromycin.

**(A)** Targeted gene deletion of *Co BUB2*. HindIII- and EcoRI-digested genomic DNA from the wild-type 104-T strain and putative *Co bub2Δ* transformants were gel-fractionated and probed with a 1-kb fragment from directly upstream of the start codon of *Co BUB2*. Through double-crossover, the 1.2-kb HindIII-EcoRI fragment of the wild-type strain was replaced with the 3.7-kb HindIII-EcoRI fragment.

**(B)** Targeted gene deletion of *Co BFA1*. EcoRI- and XhoI-digested genomic DNA from the wild-type 104-T strain and putative *Co bfa1Δ* transformants were gel-fractionated and probed with a 1-kb fragment from upstream of the start codon of *Co BFA1*. Through double-crossover, the 1.7-kb HindIII-EcoRI fragment of the wild-type strain was replaced with the 3.0-kb HindIII-EcoRI fragment.

**(C)** Targeted gene deletion of *Co TEM1*. XhoI-digested genomic DNA from 104-T wild-type strain and putative *Co tem1Δ* transformants were gel-fractionated and probed with a 1-kb fragment from upstream of the start codon of *Co TEM1*. Through double-crossover, the 1.1-kb XhoI fragment of the wild-type strain was replaced with the 2.4-kb XhoI fragment.

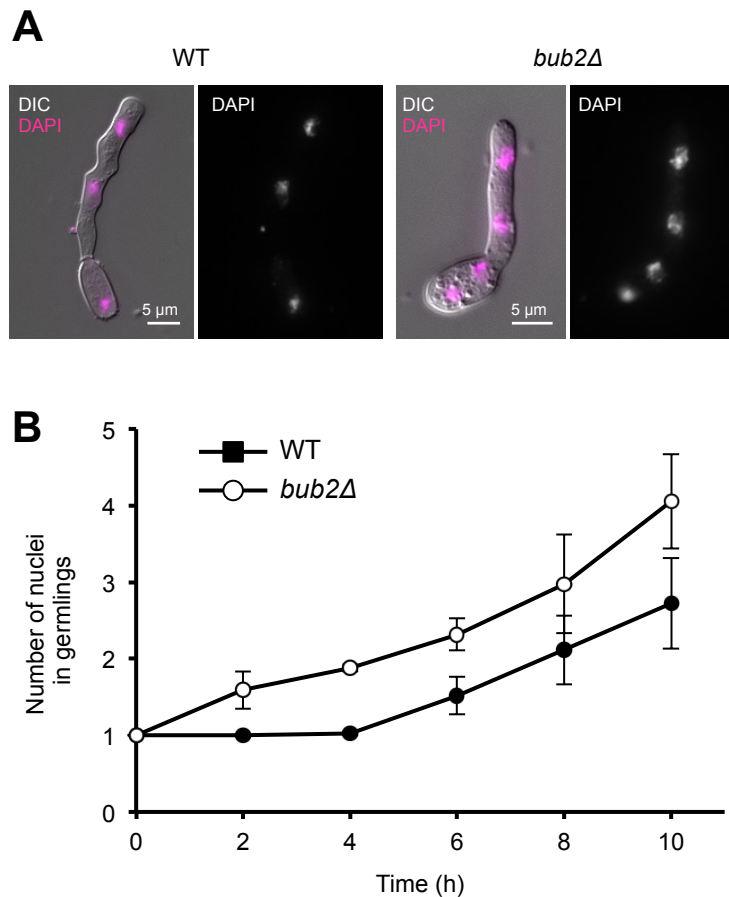

**Supplemental Figure 4.** Co *BUB2* is not involved in G1/S progression during vegetative hyphal growth in *C. orbiculare*.

**(A)** Representative images of vegetative hyphae of the wild type and Co *bub2Δ* at 10 hours post incubation. DAPI-stained nuclei were visualized by fluorescence image with magenta or white. Hyphal cells from conidia were fixed and stained with DAPI. Bars = 10  $\mu$ m.

**(B)** Mean percentage ( $\pm$  SE,  $n = 3$ ) of the number of nuclei in germlings of the wild type and Co *bub2Δ*. At least 200 germlings were examined at each time point.

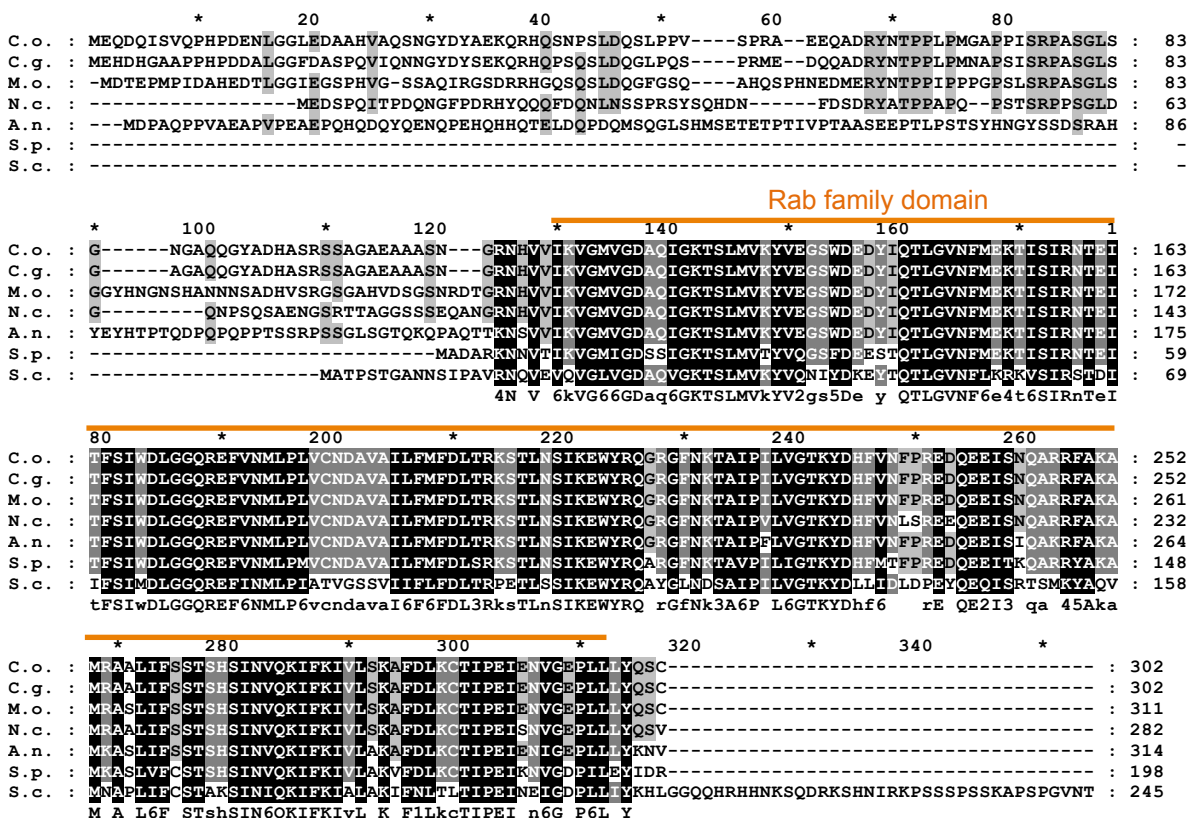

### Supplemental Figure 5. Amino acid sequence alignment of Co Tem1 homologs.

Co Tem1 homologs were identified in *Colletotrichum graminicola* (C.g), *Magnaporthe oryzae* (M.o.), *Neurospora crassa* (N.c.), *Aspergillus nidulans* (A.n.), *Schizosaccharomyces pombe* (S.p.), and *Saccharomyces cerevisiae* (S.c.). The alignment was generated using Clustal W and shaded using Gene Doc. Numbers on the right indicate amino acid residue positions. Shading of residues represents percentage amino acid conservation: black, 100%; dark grey, 80%; light grey, 70%. Gaps introduced for alignments are indicated by a hyphen. The Rab family domain is indicated by an orange line.



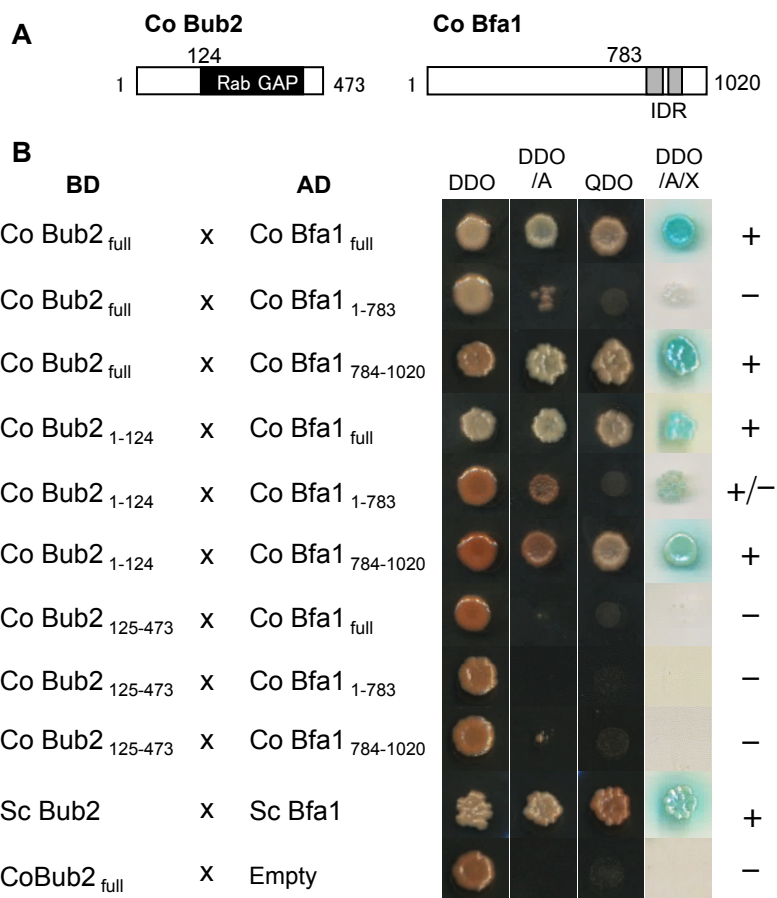

### Supplemental Figure 6. Co Bub2 interacts with Co Bfa1 in yeast two-hybrid assays.

**(A)** Schematic representation of *C. orbiculare* Co Bub2 and Co Bfa1. The 124 amino acid sequence of the N-terminal in Co Bub2 is specific to filamentous fungi and absent in yeast. Rab GAP of Co Bub2 is labeled in black; the imperfect direct repeats (IDR) of Co Bfa1 are labeled in gray.

**(B)** Interaction of Co Bub2 with Co Bfa1 assayed by a yeast two-hybrid experiment. Co Bub2 proteins were expressed in fusion with GAL4BD (BD) protein, and their interactions with Co Bfa1 proteins fused with GAL4AD (AD) were tested. For the positive control, the interaction of *S. cerevisiae* Bub2p with Bfa1p was analyzed. Yeast transformants were grown on SD medium lacking the indicated amino acids. Interaction was assessed from growth on SD -Trp -Leu + AbA (DDO/A), SD -Trp -Leu - Ade -His (QDO), and SD -Trp -Leu + AbA + X- $\alpha$ -Gal (DDO/A/X) medium. Empty-BD vector and empty-AD vector were used as the negative control. +, interaction; -, no interaction.

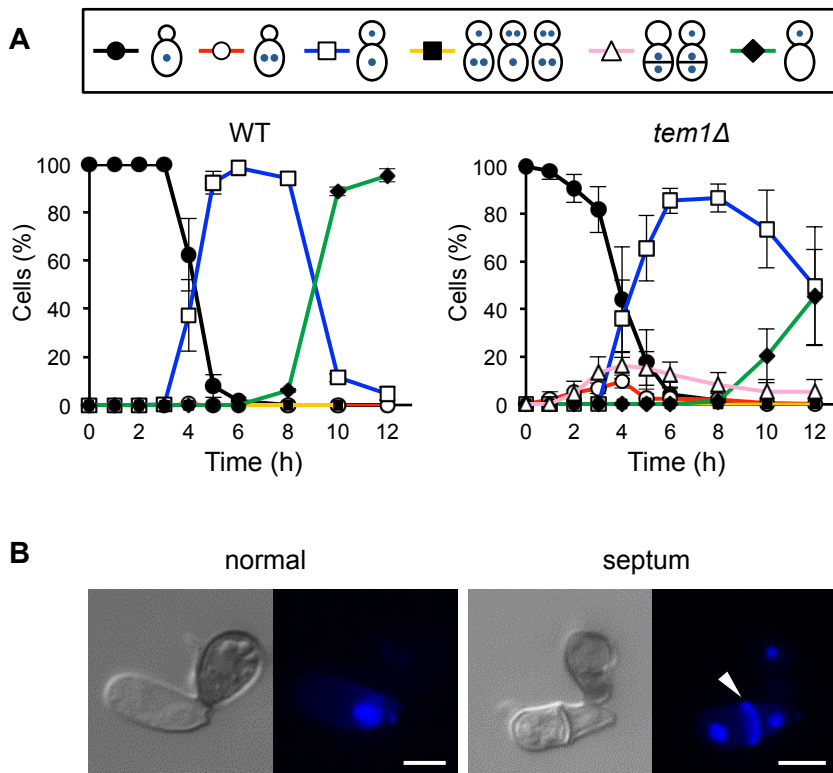

**Supplemental Figure 7.** *Co tem1Δ* is impaired in septum formation but not in nuclear behavior during appressorium development.

**(A)** Mean percentage ( $\pm$  SE,  $n = 3$ ) of cells with various patterns of nuclear distribution in the wild type and *Co tem1Δ*. Scoring: one nucleus retained in the conidium (black), two nuclei retained in the conidium (red), one nucleus in the conidium and the other in the appressorium through mitosis (blue), multiple nuclei in the conidium and appressorium through second or third mitosis (yellow), one nucleus in the appressorium and degradation of the remaining nucleus in the conidium through autophagy (green), two or three nuclei forming an aberrantly extra septum in the middle of appressorium-forming conidia (pink). At least 200 conidia were assessed at each time point.

**(B)** Representative images of septum formation during appressorium morphogenesis in *Co tem1Δ* at 10 hpi. Germinating conidia were fixed and stained with DAPI and calcofluor white (40 ng/mL). Samples were observed by fluorescence microscope. White arrowhead shows an aberrant extra septum at the conidium. Bars = 10  $\mu$ m.

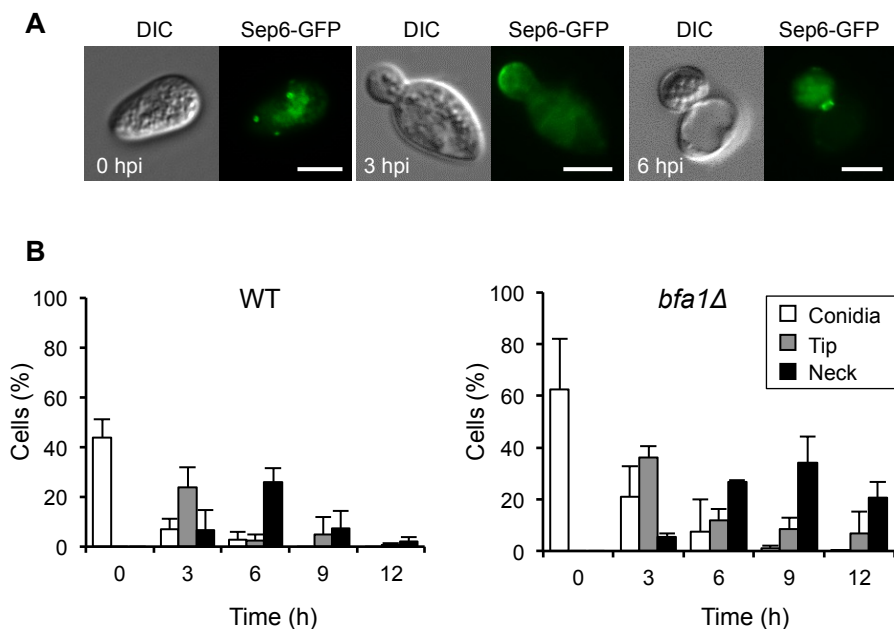

**Supplemental Figure 8.** Co Bub2/Co Bfa1 affects the localization of septin during appressorium development in *C. orbiculare*.

**(A)** Representative images of Sep6-GFP localization in fungal cells during appressorium development. Strains that carried Sep6-GFP were incubated on a glass slide and observed over time; septin was first observed in conidia at 0 h, germlings at 3 h, and initial appressoria at 6 h. Bars = 10  $\mu$ m.

**(B)** Mean percentage ( $\pm$  SE,  $n = 3$ ) of cells with Sep6-GFP localization in the wild type and Co *bfa1Δ*. Sep6-GFP fluorescence in the each strain was localized in conidia (white bar), the tip of immature appressoria (grey bar), or the neck of appressoria in a ring (black bar). At least 200 conidia were assessed at each time point.



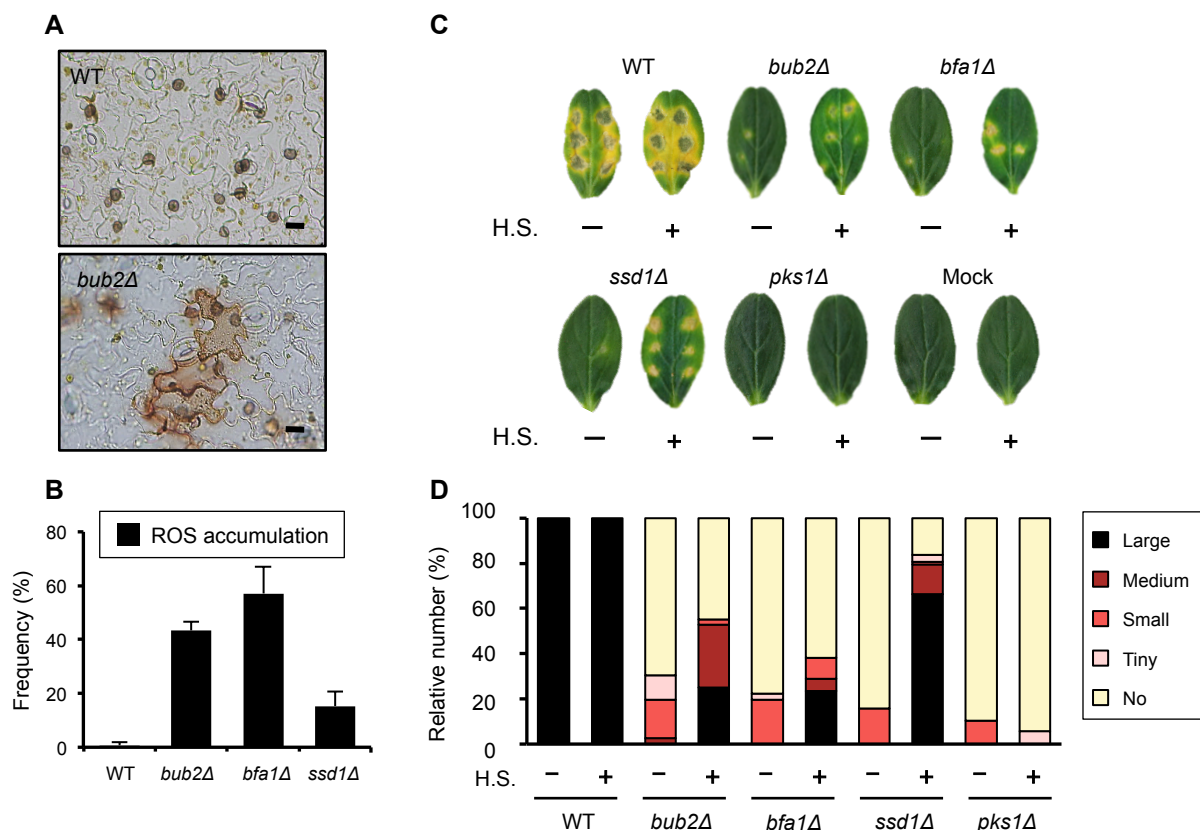

**Supplemental Figure 9.** A defense response in plants was induced by attempted penetration by appressoria of *C. orbiculare* mutants *Co bub2Δ* and *Co bfa1Δ*.

**(A)** Representative images of reactive oxygen species ( $H_2O_2$ ) accumulation at sites of attempted penetration by appressoria of the wild type and *Co bub2Δ*. Epidermis of cucumber cotyledons removed 3 days after inoculation with *Co bub2Δ*, stained with DAB to detect reactive oxygen species, and then observed with bright-field microscopy. Bars = 10  $\mu$ m.

**(B)** Mean percentage (+ SE,  $n = 3$ ) of reactive oxygen species accumulation at sites of attempted penetration by appressoria of the wild type, *Co bub2Δ*, *Co bfa1Δ*, and *Co ssd1Δ* at 3 dpi. *Co ssd1Δ* was used as the control. At least 200 appressoria were assessed for each fungal strain.

**(C)** Dark, yellowish sunken necrotic areas on cucumber cotyledons with resistance impaired by heat-shock treatment. Conidial suspensions of the wild type, *Co bub2Δ*, *Co bfa1Δ*, *Co ssd1Δ*, and *Co pks1Δ* were dropped onto a heat-shocked cucumber cotyledon (H.S. +) or without heat-shocked cotyledon (H.S. -) and incubated at 24°C for 7 days. *Co ssd1Δ* was used as the positive control, and *Co pks1Δ* was used as the negative control. Mock, distilled water control.

**(D)** Bar charts showing disease symptoms on heat-shock-treated cucumber cotyledons scored at 7 dpi. Symptom definitions: large = lesions larger than the inoculated spot, necrosis present; medium = lesions similar in size to the inoculated spot, necrosis present; small = lesions not larger than inoculated spot, no necrosis; tiny, lesions dot sized (< 1 mm); no = no disease symptoms.

**Supplemental Table 1.** Growth rate and conidiation of mutants on PDA medium.

| Strain <sup>a</sup>                                                       | Vegetative growth<br>(mm/3 days) <sup>b</sup> | Conidia<br>( $\times 10^7$ /colony) <sup>c</sup> |
|---------------------------------------------------------------------------|-----------------------------------------------|--------------------------------------------------|
| WT                                                                        | 18.67 $\pm$ 0.82                              | 3.32 $\pm$ 0.44                                  |
| <i>bub2</i> $\Delta$                                                      | 17.00 $\pm$ 0.89                              | 0.67 $\pm$ 0.13**                                |
| <i>bfa1</i> $\Delta$                                                      | 12.50 $\pm$ 6.12                              | 0.41 $\pm$ 0.11**                                |
| <i>bub2</i> $\Delta$ <i>bfa1</i> $\Delta$ + Sc <i>BUB2</i> Sc <i>BFA1</i> | 16.67 $\pm$ 0.52                              | 1.00 $\pm$ 0.35**                                |
| WT + Co Tem1 <sup>T128N</sup>                                             | 17.33 $\pm$ 0.00                              | 1.80 $\pm$ 0.26                                  |
| <i>bub2</i> $\Delta$ + Co Tem1 <sup>T128N</sup>                           | 17.00 $\pm$ 0.82                              | 1.24 $\pm$ 0.29                                  |
| <i>bfa1</i> $\Delta$ + Co Tem1 <sup>T128N</sup>                           | 17.67 $\pm$ 0.52                              | 1.32 $\pm$ 0.3                                   |

<sup>a</sup> *C. orbiculare* wild type (WT), Co *bub2* $\Delta$  (*bub2* $\Delta$ ), Co *bfa1* $\Delta$  (*bfa1* $\Delta$ ), Co *bub2* $\Delta$  Co *bfa1* $\Delta$  expressing *S. cerevisiae* *BUB2* and *BFA1* (*bub2* $\Delta$  *bfa1* $\Delta$ +Sc *BUB2* Sc *BFA1*), and the Co Tem1<sup>T128N</sup> introduced isoform (WT+Co Tem1<sup>T128N</sup>, *bub2* $\Delta$ +Co Tem1<sup>T128N</sup>, and *bub2* $\Delta$ +Co Tem1<sup>T128N</sup>).

<sup>b</sup> Each strain was grown on PDA at 24°C. Growth rate was calculated based on the growth diameter between 3 days after incubation and 6 days after incubation. Five colonies in each strain were measured; means and standard deviations were calculated.

<sup>c</sup> Conidia produced by 7-day-old cultures were counted for five colonies of each strain; means and standard deviations were calculated.

\*\**P* < 0.05 by Tukey's test. (*n*=10)

**Supplemental Table 2. *Colletotrichum orbiculare* strains used in this study.**

| Strain                                | Genotype (plasmid used for transformation)                                               | Reference              |
|---------------------------------------|------------------------------------------------------------------------------------------|------------------------|
| 104-T (MAFF240422)                    | Wild type                                                                                | Ishida and Akai, 1969  |
| 104-T CoBub2Δ-1                       | Wild type/ENH83696Δ (pBicobub2SH)                                                        | This study             |
| 104-T CoBub2Δ-2                       | Wild type/ENH83696Δ (pBicobub2SH)                                                        | This study             |
| 104-T CoBfa1Δ-1                       | Wild type/ENH87866Δ (pBicobfa1BH)                                                        | This study             |
| 104-T CoBfa1Δ-2                       | Wild type/ENH87866Δ (pBicobfa1BH)                                                        | This study             |
| 104-T CoBub2ΔCoBfa1Δ-1                | Wild type/ENH83696Δ/ENH87866Δ (pBicobub2SH, pBicobfa1BH)                                 | This study             |
| 104-T CoBub2ΔCoBfa1Δ-2                | Wild type/ENH83696Δ/ENH87866Δ (pBicobub2SH, pBicobfa1BH)                                 | This study             |
| 104-T CoTem1Δ-1                       | Wild type/ENH82693Δ (pBicotem1BH)                                                        | This study             |
| 104-T CoTem1Δ-2                       | Wild type/ENH82693Δ (pBicotem1BH)                                                        | This study             |
| 104-T CoBub2Δ CoBub2Com               | Wild type/ENH83696Δ/ENH83696 (pBicoBub2S)                                                | This study             |
| 104-T CoBfa1Δ CoBfa1Com               | Wild type/ENH87866Δ/ENH87866 (pBicoBfa1B)                                                | This study             |
| 104-TLacOLacIGFP                      | wild type/K02913/TEF_CP011342_GFP (pCT31S, pBITEFGFPLacIB)                               | This study             |
| 104-TΔCoBub2LacOLacIGFP               | wild type/ENH83696Δ/K02913/TEF_CP011342_GFP (pCT31S, pBITEFGFPLacIB)                     | This study             |
| 104-TΔCoBfa1LacOLacIGFP               | wild type/ENH87866Δ/K02913/TEF_CP011342_GFP (pCT31S, pBITEFGFPLacIB)                     | This study             |
| 104-T CoHIH1GFP                       | Wild type/ ENH76847_GFP (pBicoHIH1-GFPB)                                                 | This study             |
| 104-T α-TUB1mRFP                      | Wild type/SCD1_Q9C413_RFP (pBI-SCD1pmRFP1-α-TUB1S)                                       | Sakaguchi et al., 2008 |
| 104-T CoHIH1-GFP α-TUB1mRFP           | Wild type/NH76847_GFP/SCD1_Q9C413_RFP (pBicoHIH1-GFPB, pBISCD1pmRFP1-α-TUB1S)            | This study             |
| 104-T CoBub2Δ CoHIH1-GFP α-TUB1mRFP   | Wild type/ENH83696Δ/NH76847_GFP/SCD1_Q9C413_RFP (pBicoHIH1-GFPB, pBI-SCD1pmRFP1-α-TUB1S) | This study             |
| 104-T CoBfa1Δ CoHIH1-GFP α-TUB1mRFP   | Wild type/ENH87866Δ/NH76847_GFP/SCD1_Q9C413_RFP (pBicoHIH1-GFPB, pBI-SCD1pmRFP1-α-TUB1S) | This study             |
| 104-TCoTEM1GFP                        | Wild type/ENH82693_GFP (pBicoTEM1-GFPB)                                                  | This study             |
| 104-TΔCoBub2CoTEM1GFP                 | Wild type/ENH83696Δ/ENH82693_GFP(pBicoTEM1-GFPB)                                         | This study             |
| 104-TΔCoBfa1CoTEM1GFP                 | Wild type/ENH87866Δ/ENH82693_GFP(pBicoTEM1-GFPB)                                         | This study             |
| 104-TCoTEM1GFPα-TUB1mRFP              | Wild type/ENH82693_GFP/SCD1_Q9C413_RFP (pBI-SCD1pmRFP1-α-TUB1S)                          | This study             |
| 104-TΔCoBub2CoTEM1GFPα-TUB1mRFP       | Wild type/ENH83696Δ/ENH82693_GFP/SCD1_Q9C413_RFP(pBI-SCD1pmRFP1-α-TUB1S)                 | This study             |
| 104-T CoBub2Δ Bub2Com                 | Wild type/ENH87866Δ/ENH82693_GFP(pBicoTEM1-GFPB)                                         | This study             |
| 104-T CoBfa1Δ Bfa1Com                 | Wild type/ENH87866Δ/NP_012587(pBI-Bfa1N)                                                 | This study             |
| 104-T CoTem1 <sup>T128N</sup>         | Wild type/ENH82693_T128N (pBI-CoTem1_T128NSB)                                            | This study             |
| 104-T CoBub2Δ CoTem1 <sup>T128N</sup> | Wild type/ENH83696Δ/ENH82693_T128N (pBI-CoTem1_T128NSB)                                  | This study             |
| 104-T CoBfa1Δ CoTem1 <sup>T128N</sup> | Wild type/ENH87866Δ/ENH82693_T128N (pBI-CoTem1_T128NSB)                                  | This study             |
| 104-T Cdc12GFP                        | Wild type/MGG07466_GFP (Cdc12_GFPS)                                                      | This study             |
| 104-T CoBfa1Δ Cdc12GFP                | Wild type/ENH87866Δ/MGG07466_GFP (Cdc12_GFPS)                                            | This study             |
| 104-T LifeactRFP                      | Wild type/Lifeact_RFP (Lifeact_RFP)                                                      | This study             |
| 104-T CoBub2Δ LifeactRFP              | Wild type/ENH83696Δ/Lifeact_RFP (Lifeact_RFP)                                            | This study             |
| 104-T CoBfa1Δ LifeactRFP              | Wild type/ENH87866Δ/Lifeact_RFP (Lifeact_RFP)                                            | This study             |

**Supplemental Table 3. Primers used in this study.**

| Name           | Sequence (5' - 3')                       | Notes 1                    | Note 2                                  |
|----------------|------------------------------------------|----------------------------|-----------------------------------------|
| g8005_F8       | ATTTCGCATTAATCAGTAAGTTCG                 |                            |                                         |
| g8005_R5       | TATCAAGGACGGCCCGTCAGACGGCGATGC           | Co <i>BUB2</i>             |                                         |
| g8005_R6       | GAGGAACAGCGCAACAGGGACCGCCCTAGC           |                            |                                         |
| g8005_R8       | TCTGTCGTTCTGTTCGACAAGTG                  |                            |                                         |
| g3970_F1       | TCTTTCGGGAAACGACC                        |                            |                                         |
| g3970_F2       | GGCAAGTAAGCGGAGGT                        |                            |                                         |
| g3970_F3       | TAATAGAAGCTCGTCCGTC                      | Co <i>BFA1</i>             | For cDNA sequencing                     |
| g3970_F4       | CGGTGACCAGCATTTCATA                      |                            |                                         |
| g3970_F5       | GACAAAGCCTCACCGAAC                       |                            |                                         |
| g3970_R1       | GTCGAAGCTGGGCGTATT                       |                            |                                         |
| g9031_F1       | AGCCTCGAACTGAAACCTAC                     |                            |                                         |
| g9031_F2       | TGGACTATCTGGCAACG                        | Co <i>TEM1</i>             |                                         |
| g9031_R1       | GCCGAGTCGATCTGATAT                       |                            |                                         |
| g8005-F1A      | GACGGTATTAGCATGGCCCTCATTGTTTGGCAT        | Co <i>BUB2</i> 5' UTR      |                                         |
| g8005-R2D      | ACGTCGACTACCGGCTCAGGACTGTAACATAT         |                            |                                         |
| g8005-F2C      | ACGTCGACTTGGGCGGATTGTAGTTTACGCAG         | Co <i>BUB2</i> 3' UTR      |                                         |
| g8005-R1B      | GCTTATCGTTATCCAGTTGGCGGATGTCGTTG         |                            | For pBICoBub2SH and pBICoBub2S plasmids |
| g8005-hphR1C   | CCGCCAAGTCGACGTTAACTGGTCCCGGTC           | Hygromycin resistant gene  |                                         |
| g8005-hphF1D   | AGCCGGTAGTCGACGTTAACTGATATTGAAGG         |                            |                                         |
| g8005-pBIF1A   | CCATGCTAATACCGTCGACCTAAATCTCGGTG         |                            |                                         |
| g8005-pBIR1B   | CTGGATAACGATAAGCTTGATATCGAATTCCT         | pBI-G4MRSrev Binary vector |                                         |
| g3970_F1A      | TCTAGAATTCGAGTCGGAAGCATCATCCGCCG         | Co <i>BFA1</i> 5' UTR      |                                         |
| g3970_R2D      | ACGTCGACTGCCAGTAGCCTCACTCACGAAC          |                            |                                         |
| g3970_F2C      | ACGTCGACTTTTCCCGAAAGACTCCCGACGGC         | Co <i>BFA1</i> 3' UTR      |                                         |
| g3970_R1B      | GCTTATCGTTAGACCTCGTTCGCCGCCACCTG         |                            | For pBICoBfa1BH and pBICoBfa1B plasmids |
| g3970_hphR1C   | CGGGAAAAGTCGACGTTAACTGGTCCCGGTC          | Hygromycin resistant gene  |                                         |
| g3970_hphF1D   | ACTGGGCAGTCGACGTTAACTGATATTGAAGG         |                            |                                         |
| g3970_pBIF1A   | CGACTCGAATTCTAGAAATACGACTCACTATA         |                            |                                         |
| g3970_pBIR1B   | AGGTCTAACGATAAGCTTGATATCGAATTCCT         | pBI-G4MRBrev Binary vector |                                         |
| g9031_F1A_2    | TCTAGAATTTGGTACCTAGGTAAGGCACTATA         | Co <i>TEM1</i> 5' UTR      |                                         |
| g9031_R2D_2    | ACGTCGACTAGTGACGAGGACAGCTGGCAGTC         |                            |                                         |
| g9031_F2C_2    | ACGTCGACTTTTGTCTTTGCGACGCATGGCCC         | Co <i>TEM1</i> 3' UTR      |                                         |
| g9031_R1B_2    | GCTTATCGTCTCGGATAGCAAGTCCTAGAAA          |                            | For pBICoTem1BH plasmids                |
| g3970_hphR1C   | CGGGAAAAGTCGACGTTAACTGGTCCCGGTC          | Hygromycin resistant gene  |                                         |
| g3970_hphF1D   | ACTGGGCAGTCGACGTTAACTGATATTGAAGG         |                            |                                         |
| g9031_pBIF1A_2 | GGTACCAAATCTAGAAATACGACTCACTATAGGGCGAAT  |                            |                                         |
| g9031_pBIR1B_2 | TCCGACGAGGATAAGCTTGATATCGAATTCCTGCAGCCCG | pBI-G4MRBrev Binary vector |                                         |
| LacI_F1        | GGGTGGTGGTGGTGGTatgGTGAAACCAGTAACGT      | LacI-NLS                   |                                         |
| NLS_R1         | TTAGGCAACCTTTCTCTTCTTCTTGGTGGAGTAC       |                            | For pBITEFGFP_LacI_B plasmids           |
| glyGFPR1       | ACCACCACCACCCTTGTACAGCTCGTC              | pBITEFGFPB vector          |                                         |
| pBI-NLS_R1     | GAGAAAGGTTGCCTAAGGTACCGGGCCCCCCTCG       |                            |                                         |
| glyGFPP1       | GGAGGAGGAGGAGGAATGGTGAGCAAGGGC           | gly GFP                    |                                         |
| GFPR1          | TTACTTGTACAGCTCGTCCATGCCGAGAGT           |                            |                                         |
| g1862_F1A      | TCTAGAATTTAGAACGACAGGCGGTAGGACCT         | Co <i>HIH1</i> 5' UTR      | For pBICoHIH1-GFPB plasmids             |
| g1862_pBIR1B   | ATGTTGAACGATAAGCTTGATATCGAATTCCT         |                            |                                         |
| g1862_R1B      | ACGTCGACTCGCTTGAAGTCGAGGAAAAGCCG         | Co <i>HIH1</i> 3' UTR      |                                         |
| g1862_pBIF1A   | CGTCTAAATCTAGAAATACGACTCACTATA           |                            |                                         |
| glyGFPP1       | GGAGGAGGAGGAGGAATGGTGAGCAAGGGC           | glyGFP                     |                                         |
| GFPR1          | TTACTTGTACAGCTCGTCCATGCCGAGAGT           |                            | For pBICoTEM1-GFPB plasmids             |
| CoTem1_pBIR5   | TTCTCTCTCTCCTCCGCAAGACTGGTACAGCAGC       |                            |                                         |
| CoTem1_pBIF5   | CGAGCTGTACAAGTAATGATCCCGGCTCCATGTGC      | pBICoTem1B plasmid         |                                         |

**Supplemental Table 3. Primers used in this study.**

| Name            | Sequence (5' - 3')                        | Notes 1                              | Note 2                                     |
|-----------------|-------------------------------------------|--------------------------------------|--------------------------------------------|
| bub2_F3         | ACGCGCCAAGATGACCTCAATTGAAGATCTGATAT       | Sc <i>BUB2</i> ORF                   |                                            |
| bub2_R3         | GCCAACGCGGTTACGGTATATATATGTCTGGGTCC       |                                      | For pBIBub2B plasmids                      |
| g8005_F11_Sc    | TCTTCAATTGAGGTCATCTTGGCGCGTGTGTACC        | pBICoBUB2B plasmid                   |                                            |
| g8005_R11_Sc    | ATATATATACCGTAACCGCGTTGGCTCTGGAAAAGA      |                                      |                                            |
| bfa1_F2         | TACCAACGCCATGTCAATTAGGCCTCTCACGTTAA       | Sc <i>BFA1</i> ORF                   |                                            |
| bfa1_R2         | TGAAGTGAGGCTAATCTTTTGTGCAATTGATTACC       |                                      | For pBIBfa1N plasmids                      |
| g3970_F7        | CCTAATTGACATGGCGTTGGTAAGTTTTGTTTGGT       | pBICoBFA1N plasmid                   |                                            |
| g3970_R7        | ACAAAAGATTAGCCTCACTCACGAACATCACATTT       |                                      |                                            |
| g9031_F1A_2     | TCTAGAATTTGGTACCTAGGTAAGGCACACTATA        | Co <i>Tem1</i> <sup>T128N</sup> 5'   |                                            |
| g9031_T128N_R1  | ACTTGACCATCAGACTATCTTGGCGATTTGCGCG        |                                      |                                            |
| g9031_R1B_2     | GCTTATCGTCTCGGATAGCAAGTCTTAGAAA           | Co <i>Tem1</i> <sup>T128N</sup> 3'   |                                            |
| g9031_T128N_F1  | CGCGCAAATCGGAAGAATAGTCTGATGGTCAAGT        |                                      |                                            |
| g9031_pBIF1A_2  | GGTACCAAATTTAGAAAATACGACTCACTATAGGGCGAAT  | pBIG4MRBrev Binary vector            | For pBICoTem1 <sup>T128N</sup> SB plasmids |
| g9031_pBIR1B_2  | TCGCAGGACGATAAGCTTGATATCGAATTCCTGCAGCCCCG |                                      |                                            |
| Sur_R1B         | GTCGACGTGAGAGCATGCAATTCCTCGTGA            | Sulfonylurea resistant gene          |                                            |
| Sur_F1A         | GTCGACGTGCCAACGCCACAGTGCCCCACAT           |                                      |                                            |
| g9031_pm_pBIF4A | TGCTCTCACGTCGACCTGCGACTGGCCAAGTCTTG       | pBICoTem1 <sup>T128N</sup> B plasmid |                                            |
| g9031_pm_pBIR4B | CGTTGGCACGTCGACCGTTTTTCACTGCCACTAGTT      |                                      |                                            |
| Y_bub2_F1       | CATGGAGGCCGAATTCATGCCCGGAGTCCAACGA        | Co <i>BUB2</i> 1-                    |                                            |
| Y_bub2_R1       | GCAGGTCGACGGATCCCTACTGGGCATGCGCGACA       | Co <i>BUB2</i> -472                  |                                            |
| Y_bub2_R2       | GCAGGTCGACGGATCCCTAGTTTGTGTATCGCGGG       | Co <i>BUB2</i> -124                  |                                            |
| Y_bub2_F2       | CATGGAGGCCGAATTCATGTCTCTGCACCAGCTTA       | Co <i>BUB2</i> 124-                  |                                            |
| Y_bub2_F5       | CATGGAGGCCGAATTCATGACCTCAATTGAAGATC       | Sc <i>BUB2</i> 1-                    |                                            |
| Y_bub2_R5       | GCAGGTCGACGGATCCTTACGGTATATATATGTCT       | Sc <i>BUB2</i> -302                  |                                            |
| Y_bfa1_F1       | CATGGAGGCCGAATTCATGGAACCTTTGCGCCTAA       | Co <i>BFA1</i> 1-                    |                                            |
| Y_bfa1_R1       | GCAGGTCGACGGATCCCTACTGGGCAGCCCTCTGG       | Co <i>BFA1</i> -1020                 |                                            |
| Y_bfa1_R2       | GCAGGTCGACGGATCCCTACGGCACGCCGGGGCTG       | Co <i>BFA1</i> -783                  |                                            |
| Y_bfa1_F2       | CATGGAGGCCGAATTCCTCAATTCGGTCAA            | Co <i>BFA1</i> 784-                  |                                            |
| Y_bfa1_F3       | CATGGAGGCCGAATTCATGTCAATTAGGCCTCTCA       | Sc <i>BFA1</i> 1-                    |                                            |
| Y_bfa1_R3       | GCAGGTCGACGGATCCCTAATCTTTTGTGCAATTG       | Sc <i>BFA1</i> -302                  |                                            |
| Y_tem1_F1       | CATGGAGGCCGAATTCATGGAGCAAGATCAGATCT       | Co <i>TEM1</i> 1-                    |                                            |
| Y_tem1_R1       | GCAGGTCGACGGATCCTCAGCAAGACTGGTACAGC       | Co <i>TEM1</i> -302                  |                                            |
| Y_tem1_R2       | GCAGGTCGACGGATCCTCAACCGTTACTCGCGCG        | Co <i>TEM1</i> -109                  |                                            |
| Y_tem1_F2       | CATGGAGGCCGAATTCGCAACCACGTGTCATCA         | Co <i>TEM1</i> 110-                  |                                            |
| Y_tem1_F6       | CATGGAGGCCGAATTCATGGCTACACCAAGCACGG       | Sc <i>TEM1</i> 1-                    | For pGBKT7- and pGADT7- plasmids           |
| Y_tem1_R6       | GCAGGTCGACGGATCCTCATGTATTAACGCCCGGC       | Sc <i>TEM1</i> -302                  |                                            |
| Y_BUB2_AD_F1    | GGAGGCCAGTGAATTCGCGCCGAGTCCAACGAGAG       | Co <i>BUB2</i> 1-                    |                                            |
| Y_BUB2_AD_R1    | TCATCTGCAGCTCGAGCTACTGGGCATGCGCGACA       | Co <i>BUB2</i> -472                  |                                            |
| Y_BUB2_AD_F2    | GGAGGCCAGTGAATTCATGACCTCAATTGAAGATC       | Sc <i>BUB2</i> 1-                    |                                            |
| Y_BUB2_AD_R2    | TCATCTGCAGCTCGAGTTACGGTATATATATGTCT       | Sc <i>BUB2</i> -472                  |                                            |
| Y_BFA1_AD_F1    | GGAGGCCAGTGAATTCGAACCTTTGCGCCTAAAGC       | Co <i>BFA1</i> 1-                    |                                            |
| Y_BFA1_AD_R1    | TCATCTGCAGCTCGAGCTACTGGGCAGCCCTCTGG       | Co <i>BFA1</i> -1020                 |                                            |
| Y_BFA1_AD_R2    | TCATCTGCAGCTCGAGCTACGGCACGCCGGGGCTG       | Co <i>BFA1</i> -783                  |                                            |
| Y_BFA1_AD_F2    | GGAGGCCAGTGAATTCCTCAATTCGGTCAA            | Co <i>BFA1</i> 784-                  |                                            |
| Y_BFA1_AD_F3    | GGAGGCCAGTGAATTCATGTCAATTAGGCCTCTCA       | Sc <i>BFA1</i> 1-                    |                                            |
| Y_BFA1_AD_R3    | TCATCTGCAGCTCGAGTAACTTTTGTGCAATTG         | Sc <i>BFA1</i> -1020                 |                                            |
| Y_tem1_AD_F1    | GGAGGCCAGTGAATTCGAGCAAGATCAGATCTCCG       | Co <i>TEM1</i> 1-                    |                                            |
| Y_tem1_AD_R1    | TCATCTGCAGCTCGAGTCAAGACTGGTACAGC          | Co <i>TEM1</i> -302                  |                                            |
| pGB_F1          | GGATCCGTCGACCTGCAGCGGCCGATAACTAGCA        | pGBKT7 vector                        |                                            |
| pGB_R1          | GAATTCGCGCTCCATGGCCATATGCAGGTCCTCCT       |                                      |                                            |
| pGD_R1          | GAATTCAGTGGCTCCATGGCCATATGAGCGTAAT        | pGADT7 vector                        |                                            |
| pGD_F1          | CTCGAGCTGCAGATGAATCGTAGATACTGAAAAAC       |                                      |                                            |

**Supplemental Table 4. *Saccharomyces cerevisiae* strains used in this study.**

| Strain                           | Genotype                                                                                                                                                                | Reference  |
|----------------------------------|-------------------------------------------------------------------------------------------------------------------------------------------------------------------------|------------|
| Y2H Gold                         | <i>MAT<math>\alpha</math></i> , <i>trp1-901</i> , <i>leu2-3</i> , <i>112</i> , <i>ura3-52</i> , <i>his3-200</i>                                                         | Clontech   |
| Y187                             | <i>MAT<math>\alpha</math></i> , <i>ura3-52</i> , <i>his3-200</i> , <i>ade2-101</i> , <i>trp1-901</i> , <i>leu2-3</i> , <i>112</i> , <i>met-</i>                         | Clontech   |
| Y2H Gold: pGBKT7                 | <i>MAT<math>\alpha</math></i> , <i>trp1-901</i> , <i>leu2-3</i> , <i>112</i> , <i>ura3-52</i> , <i>his3-200</i> pGBKT7                                                  | This study |
| Y2H Gold: pGBKT7-Co Bub2         | <i>MAT<math>\alpha</math></i> , <i>trp1-901</i> , <i>leu2-3</i> , <i>112</i> , <i>ura3-52</i> , <i>his3-200</i> pGBKT7-CoBub2                                           | This study |
| Y2H Gold: pGBKT7-Co Bub2 1-124   | <i>MAT<math>\alpha</math></i> , <i>trp1-901</i> , <i>leu2-3</i> , <i>112</i> , <i>ura3-52</i> , <i>his3-200</i> pGBKT7-CoBub2 1-124                                     | This study |
| Y2H Gold: pGBKT7-Co Bub2 125-473 | <i>MAT<math>\alpha</math></i> , <i>trp1-901</i> , <i>leu2-3</i> , <i>112</i> , <i>ura3-52</i> , <i>his3-200</i> pGBKT7-CoBub2 125-473                                   | This study |
| Y2H Gold: pGBKT7-Bub2            | <i>MAT<math>\alpha</math></i> , <i>trp1-901</i> , <i>leu2-3</i> , <i>112</i> , <i>ura3-52</i> , <i>his3-200</i> pGBKT7-Bub2                                             | This study |
| Y2H Gold: pGBKT7-Co Tem1 1-94    | <i>MAT<math>\alpha</math></i> , <i>trp1-901</i> , <i>leu2-3</i> , <i>112</i> , <i>ura3-52</i> , <i>his3-200</i> pGBKT7-CoTem1 1-94                                      | This study |
| Y2H Gold: pGBKT7-Co Tem1 95-302  | <i>MAT<math>\alpha</math></i> , <i>trp1-901</i> , <i>leu2-3</i> , <i>112</i> , <i>ura3-52</i> , <i>his3-200</i> pGBKT7-CoTem1 95-302                                    | This study |
| Y2H Gold: pGBKT7-Tem1            | <i>MAT<math>\alpha</math></i> , <i>trp1-901</i> , <i>leu2-3</i> , <i>112</i> , <i>ura3-52</i> , <i>his3-200</i> pGBKT7-Tem1                                             | This study |
| Y2H Gold: pGBKT7-Co Bfa1         | <i>MAT<math>\alpha</math></i> , <i>trp1-901</i> , <i>leu2-3</i> , <i>112</i> , <i>ura3-52</i> , <i>his3-200</i> pGBKT7-CoBfa1                                           | This study |
| Y2H Gold: pGBKT7-Bfa1            | <i>MAT<math>\alpha</math></i> , <i>trp1-901</i> , <i>leu2-3</i> , <i>112</i> , <i>ura3-52</i> , <i>his3-200</i> pGBKT7-Bfa1                                             | This study |
| Y187: pGADT7                     | <i>MAT<math>\alpha</math></i> , <i>ura3-52</i> , <i>his3-200</i> , <i>ade2-101</i> , <i>trp1-901</i> , <i>leu2-3</i> , <i>112</i> , <i>met</i> , pGADT7                 | This study |
| Y187: pGADT7-Co Bfa1             | <i>MAT<math>\alpha</math></i> , <i>ura3-52</i> , <i>his3-200</i> , <i>ade2-101</i> , <i>trp1-901</i> , <i>leu2-3</i> , <i>112</i> , <i>met</i> , pGADT7-CoBfa1          | This study |
| Y187: pGADT7-Co Bfa1 1-783       | <i>MAT<math>\alpha</math></i> , <i>ura3-52</i> , <i>his3-200</i> , <i>ade2-101</i> , <i>trp1-901</i> , <i>leu2-3</i> , <i>112</i> , <i>met</i> , pGADT7-CoBfa1 1-783    | This study |
| Y187: pGADT7-Co Bfa1 784-1020    | <i>MAT<math>\alpha</math></i> , <i>ura3-52</i> , <i>his3-200</i> , <i>ade2-101</i> , <i>trp1-901</i> , <i>leu2-3</i> , <i>112</i> , <i>met</i> , pGADT7-CoBfa1 784-1020 | This study |
| Y187: pGADT7-Bfa1                | <i>MAT<math>\alpha</math></i> , <i>ura3-52</i> , <i>his3-200</i> , <i>ade2-101</i> , <i>trp1-901</i> , <i>leu2-3</i> , <i>112</i> , <i>met</i> , pGADT7-Bfa1            | This study |
| Y187: pGADT7-Co Bub2             | <i>MAT<math>\alpha</math></i> , <i>ura3-52</i> , <i>his3-200</i> , <i>ade2-101</i> , <i>trp1-901</i> , <i>leu2-3</i> , <i>112</i> , <i>met</i> , pGADT7-CoBub2          | This study |
| Y187: pGADT7-Bub2                | <i>MAT<math>\alpha</math></i> , <i>ura3-52</i> , <i>his3-200</i> , <i>ade2-101</i> , <i>trp1-901</i> , <i>leu2-3</i> , <i>112</i> , <i>met</i> , pGADT7-Bub2            | This study |
| Y187: pGADT7-Co Tem1             | <i>MAT<math>\alpha</math></i> , <i>ura3-52</i> , <i>his3-200</i> , <i>ade2-101</i> , <i>trp1-901</i> , <i>leu2-3</i> , <i>112</i> , <i>met</i> , pGADT7-CoTem1          | This study |
