# Supplementary material
Source: PubMed Central journal article supplement (PMC4815103)
Supplement: supp_tpc.15.00179_TPC2015-00179-RAR1_Supplemental_Movie_Legends_FINAL.pdf [file supp_tpc.15.00179_TPC2015-00179-RAR1_Supplemental_Movie_Legends_FINAL.pdf]

**Supplemental Movie 1.** Time-lapse imaging of nuclear division during appressorium development in wild-type *C. orbiculare*.

Video of nuclear division in *C. orbiculare* wild-type during appressorium development. The *mRFP1- $\alpha$ -TUB1* (mitotic spindle) and *Histone H1-GFP* (nuclei) gene fusion vectors were introduced into wild-type and incubated in conditions to allow appressorium development. Nuclear division was recorded 4 hpi. Images were acquired at 15-s intervals for 6 min with sequential excitation at the two wavelengths. Bar = 5  $\mu$ m.

**Supplemental Movie 2.** Time-lapse imaging of nuclear division in pre-germination conidia of *C. orbiculare* *bub2* $\Delta$ .

Video of nuclear division in *C. orbiculare* *bub2* $\Delta$  during appressorium development. The *mRFP1- $\alpha$ -TUB1* (mitotic spindle) and *Histone H1-GFP* (nuclei) gene fusion vectors were introduced into Co *bub2* $\Delta$  and incubated in conditions to allow appressorium development. Nuclear division was recorded 2 hpi. Images were acquired at 15-s intervals for 6 min with sequential excitation at the two wavelengths. Bar = 5  $\mu$ m.
